# Supplementary material for: Synergistic effect of 1D bismuth Nanowires/2D graphene composites for high performance flexible anodes in sodium-ion batteries
Source: Royal Society of Chemistry journal article supplement (doi:10.1039/d3ta01214j), 2023-01-01
Supplement: d3ta01214j1.pdf [file d3ta01214j1.pdf]

Supporting information

## **Synergistic Effect of 1D Bismuth Nanowires/2D Graphene Composites for High Performance Flexible Anodes in Sodium-ion Batteries**

Xiaolong Cheng <sup>a</sup>, Hai Yang <sup>b</sup>, Changyun Wei <sup>a</sup>, Fangzhi Huang <sup>a,\*</sup>, Yu Yao <sup>b</sup>, Ruilin Bai <sup>b</sup>, Yu Jiang <sup>a,\*</sup>, and Shikuo Li <sup>a,\*</sup>

<sup>a</sup> Photoelectric Conversion Energy Materials and Devices Key Laboratory of Anhui Province, Key Laboratory of Structure and Functional Regulation of Hybrid Materials (Anhui University) Ministry of Education, School of Material Science and Engineering & School of Chemistry and Chemical Engineering, Anhui University, Hefei, Anhui, 230601, P. R. China.

<sup>b</sup> Hefei National Laboratory for Physical Sciences at the Microscale, Department of Materials Science and Engineering, CAS Key Laboratory of Materials for Energy Conversion, University of Science and Technology of China, Hefei, Anhui 230026, P. R. China

\* Corresponding author.

Email address: *lishikuo@ahu.edu.cn* (Shikuo Li), *hfz@ahu.edu.cn* (Fangzhi Huang), *jiangyu21@ahu.edu.cn* (Yu Jiang)

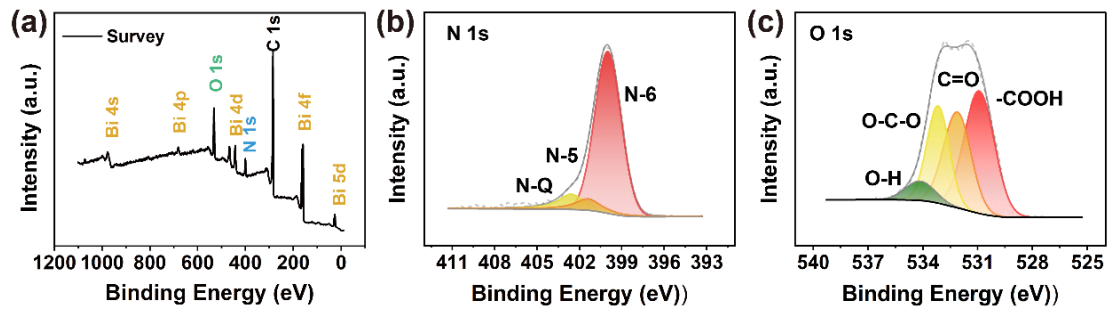

**Fig. S1.** XPS spectra (a), high resolution N 1s spectra (b) and high-resolution O 1s spectra of the BNW@G film.

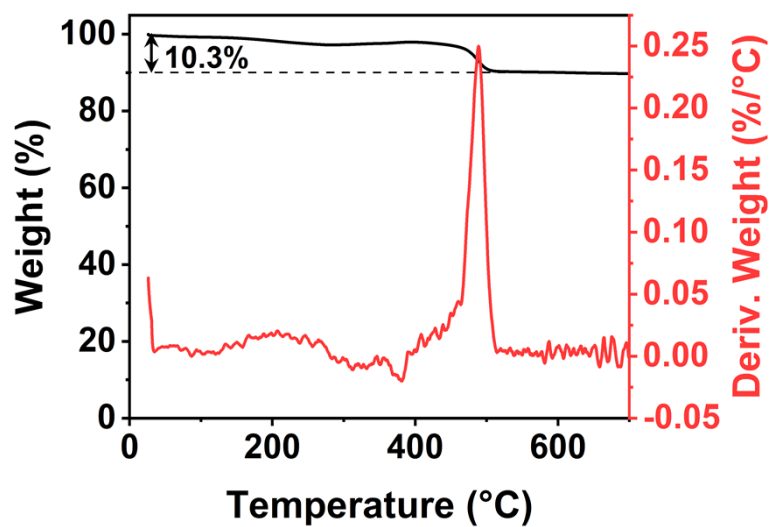

**Fig. S2.** TGA and DSC analysis of the BNW@G film.

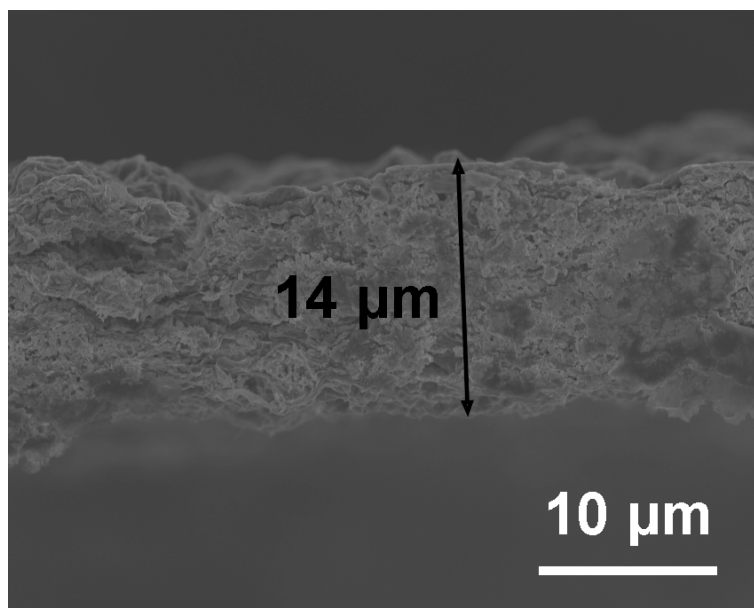

**Fig. S3.** SEM image of the cross section of the BNW@G film.

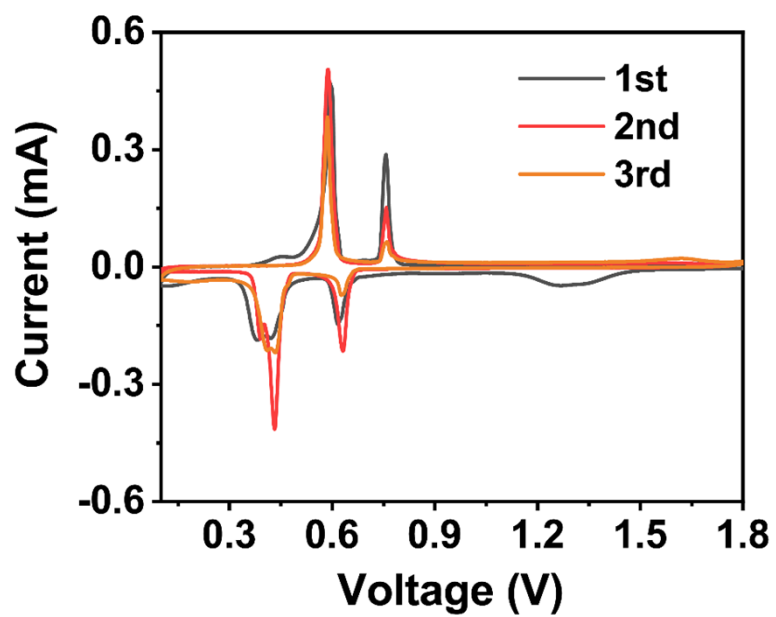

Fig. S4. The CV curves of the BNW electrode at  $0.1 \text{ mV s}^{-1}$ .

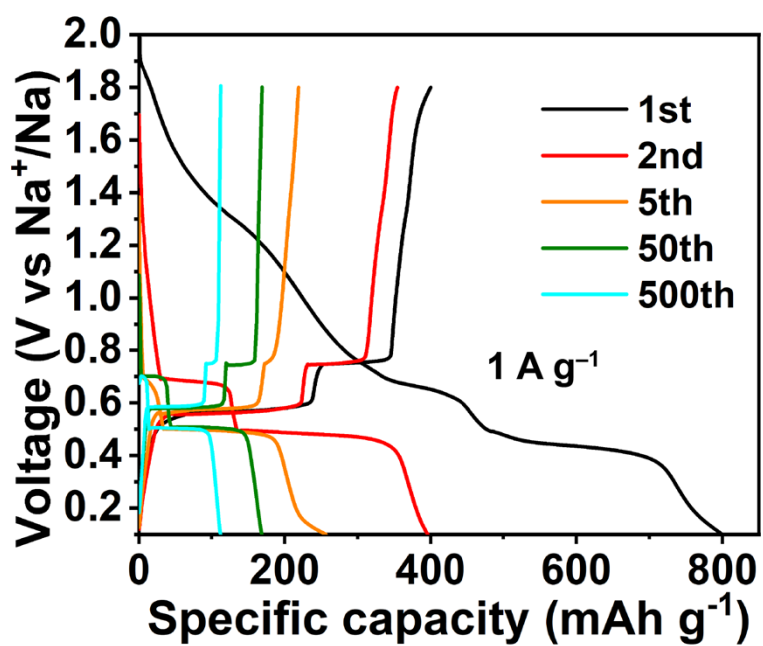

Fig. S5. The discharge/charge curves of the BNW electrode in NIBs at  $1 \text{ A g}^{-1}$ .

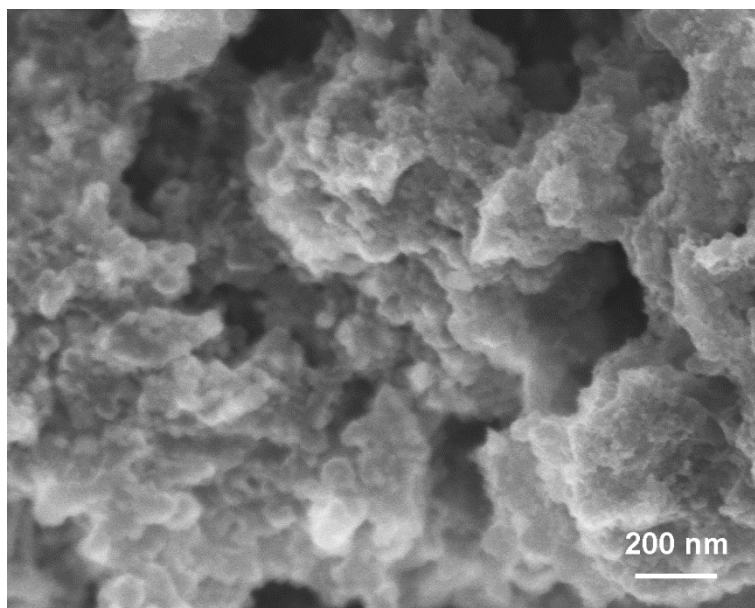

**Fig. S6.** SEM image of the BNW anode after 50 cycles at 0.1 A g<sup>-1</sup>.

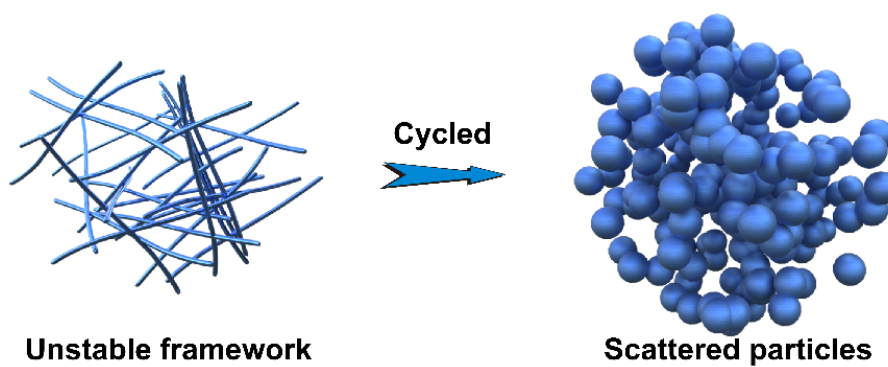

**Fig. S7.** Schematically illustration of the morphology evolution of the BNW electrode.

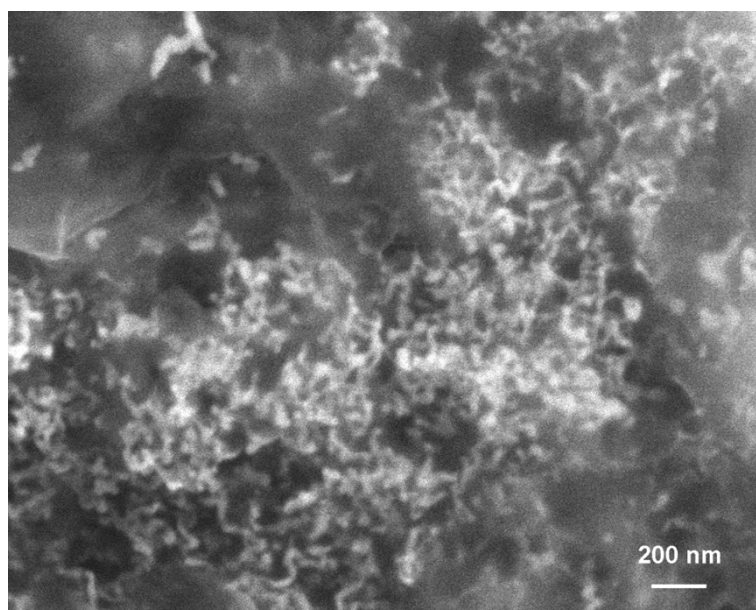

**Fig. S8.** SEM image of the BNW@G film after 50 cycles at  $0.1 \text{ A g}^{-1}$ .

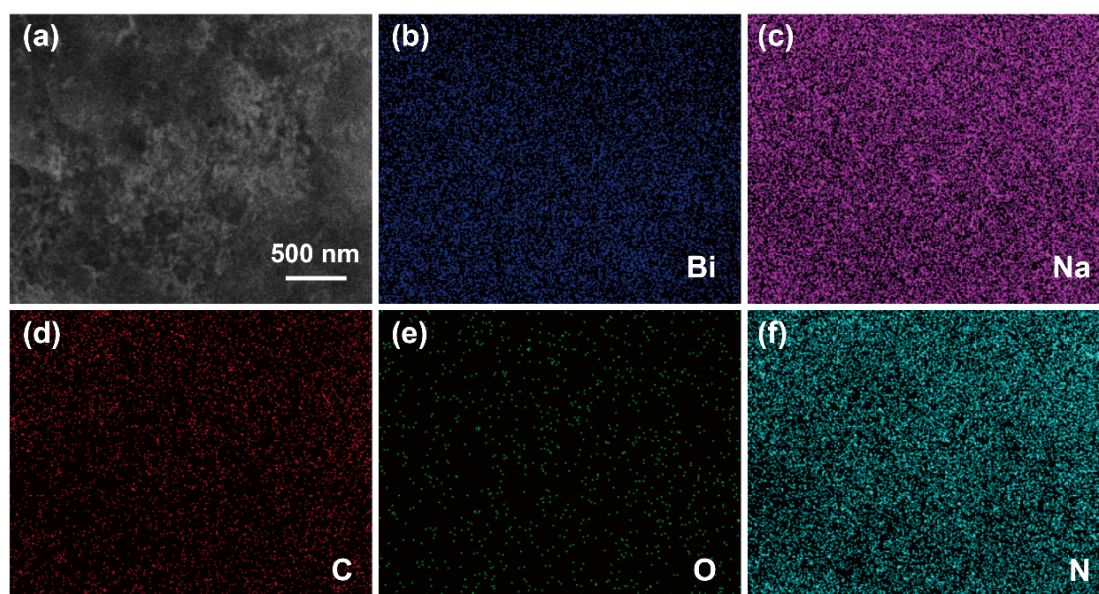

**Fig. S9.** High-magnification image (a) and the corresponding element mapping (Bi, Na, C, O and N) (b-f) of the BNW@G film after 50 cycles at  $0.1 \text{ A g}^{-1}$ .

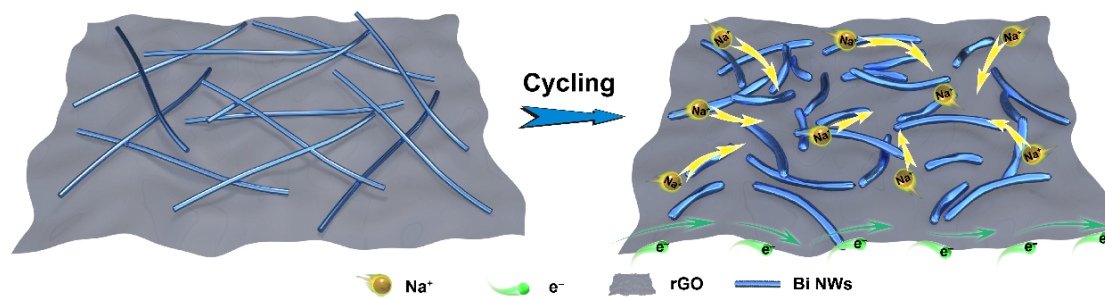

**Fig. S10.** Schematically illustration of the morphology evolution of the flexible BNW@G film electrode.

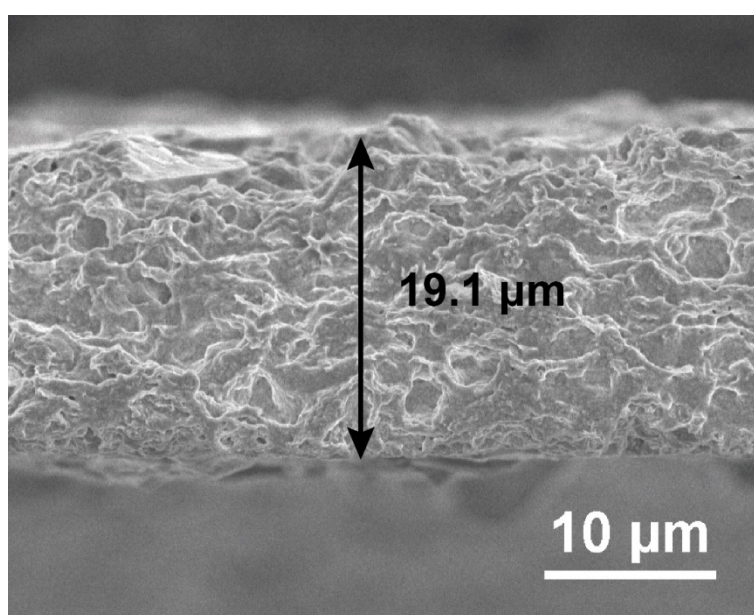

**Fig. S11.** SEM image of the cross section of the BNW@G film after 50 cycles at 0.1 A g<sup>-1</sup>.

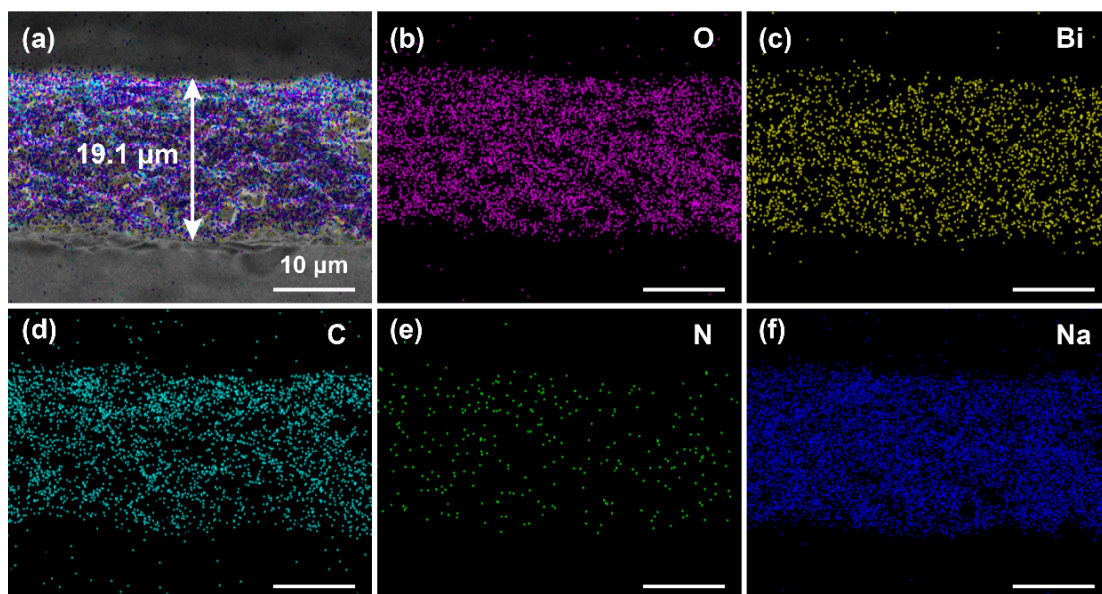

**Fig. S12.** High-magnification image (a) and the corresponding element mapping (Bi, Na, C, O and N) (b-f) of the cross section of the BNW@G film after 50 cycles at 0.1 A g<sup>-1</sup>.

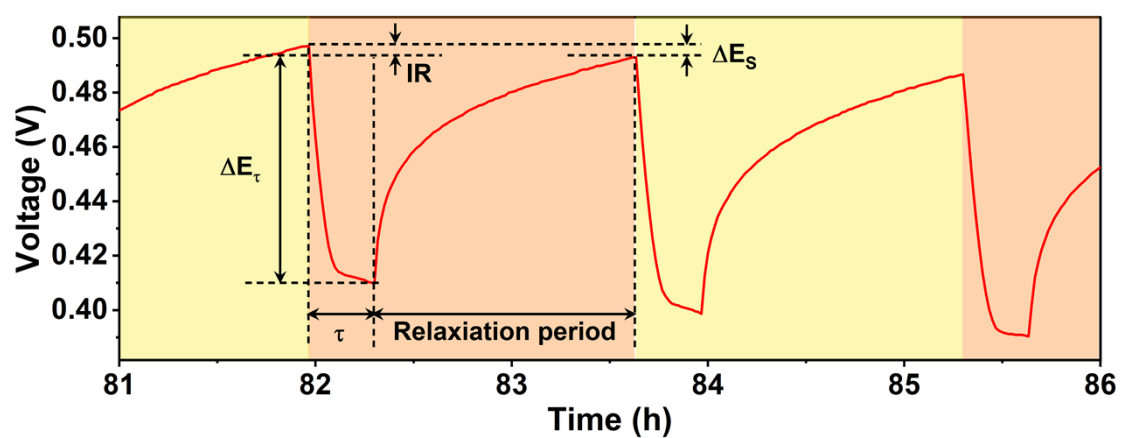

**Fig. S13.** Calculation of the diffusion coefficient. Schematic of the calculation of the diffusion coefficient using the GITT technique.

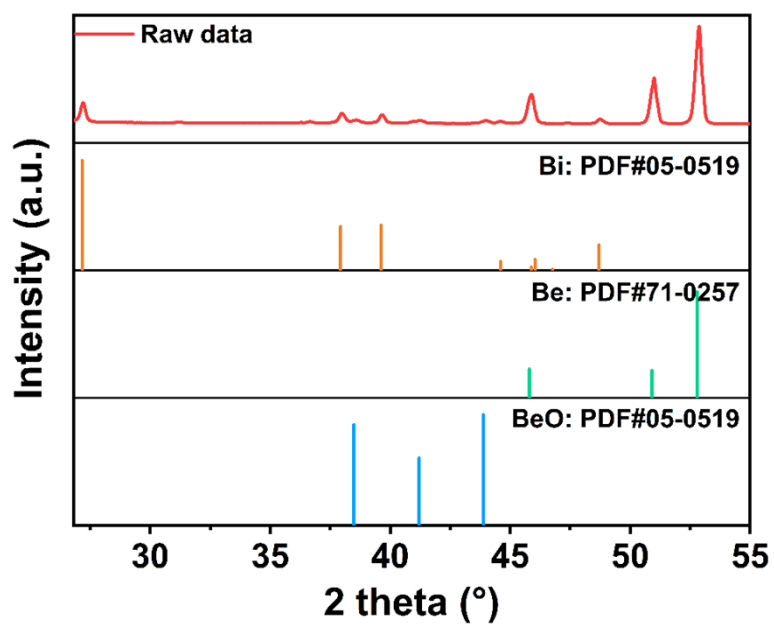

**Fig. S14.** XRD pattern of the BNW@G electrode in the in-situ XRD test devices.

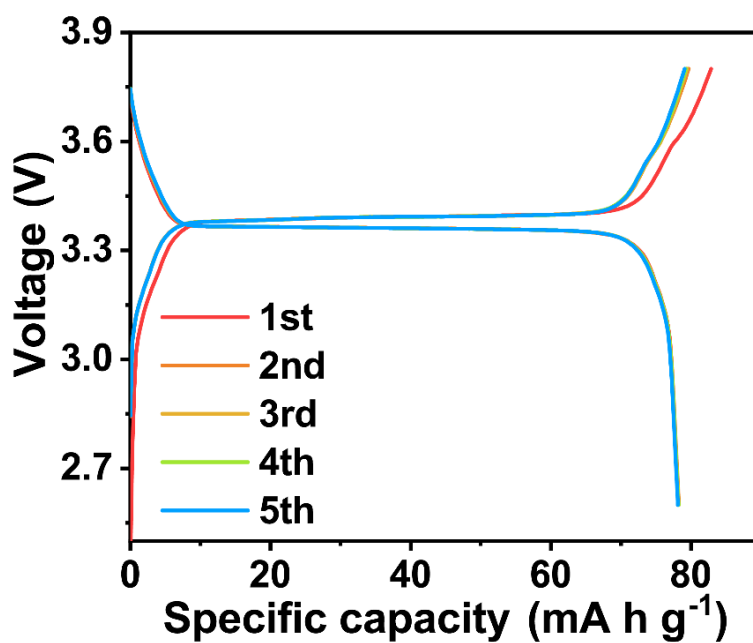

**Fig. S15.** The discharge/charge curves of the NVP@G electrode under activation in NIBs at  $0.1 \text{ A g}^{-1}$ .
